# Supplementary material for: Alterations of Oxidative Stress Indicators, Antioxidant Enzymes, Soluble Sugars, and Amino Acids in Mustard [Brassica juncea (L.) Czern and Coss.] in Response to Varying Sowing Time, and Field Temperature
Source: PubMed Central journal article supplement (PMC9111527; doi:10.3389/fpls.2022.875009), 2022-05-03
Supplement: Image_1.pdf [file Image_1.pdf]

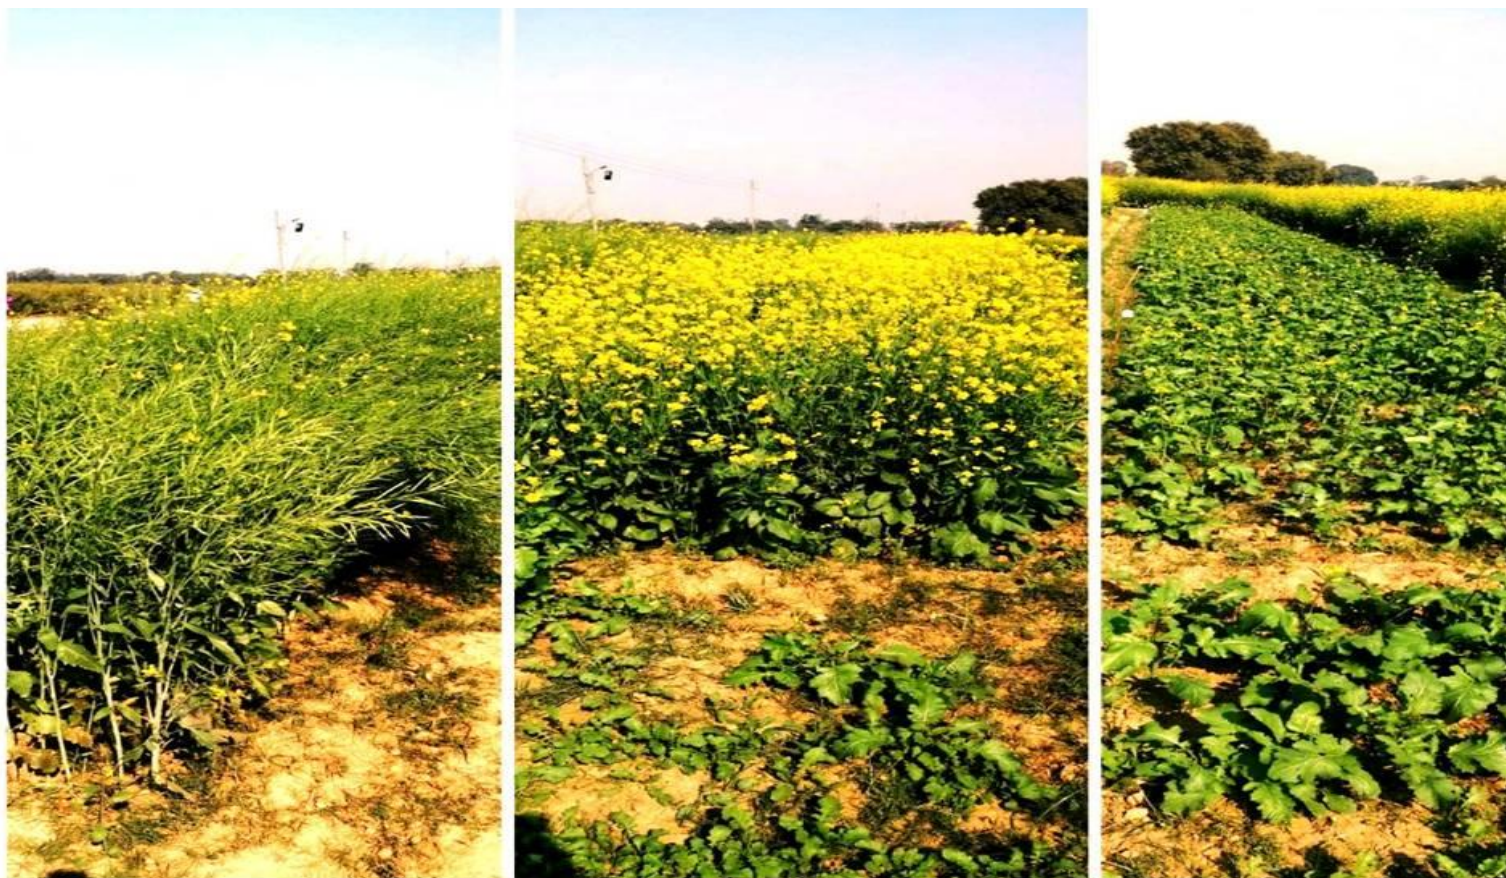

S1

S2

S3

**Figure S1** Showed the field view of Indian Brassica at different dates of sowing (S1; 30 October, S2, 15 November, S3; 30 November).
